# Supplementary material for: Association Between Intensity of Low-Density Lipoprotein Cholesterol Reduction With Statin-Based Therapies and Secondary Stroke Prevention: A Meta-analysis of Randomized Clinical Trials
Source: PubMed Central journal article supplement (PMC8861901; doi:10.1001/jamaneurol.2021.5578), 2022-02-21
Supplement: jamaneurol-e215578-s001.pdf [file jamaneurol-e215578-s001.pdf]

## Supplementary Online Content

Lee M, Cheng CY, Wu YL, Lee JD, Hsu CY, Ovbiagele B. Association between intensity of low-density lipoprotein cholesterol reduction with statin-based therapies and secondary stroke prevention: a meta-analysis of randomized clinical trials. *JAMA Neurol*. Published online February 21, 2022.

doi:10.1001/jamaneurol.2021.5578

**eFigure 1.** Study Selection

**eFigure 2.** Risk of Bias

**eFigure 3:** MACE

**eFigure 4.** Recurrent Ischemic Stroke

**eFigure 5.** Myocardial Infarction

**eFigure 6.** All-Cause Mortality

**eFigure 7.** Cardiovascular Mortality

**eFigure 8.** New-Onset Diabetes

**eFigure 9.** Cognitive Adverse Events

**eFigure 10.** Recurrent Stroke

**eFigure 11.** Recurrent Stroke

**eFigure 12.** Meta-regression

**eFigure 13.** Subgroup Analyses

**eFigure 14.** Publication Bias

**eReferences.**

This supplementary material has been provided by the authors to give readers additional information about their work.

## eFigure 1. Study Selection

Legends: Flow of study selection

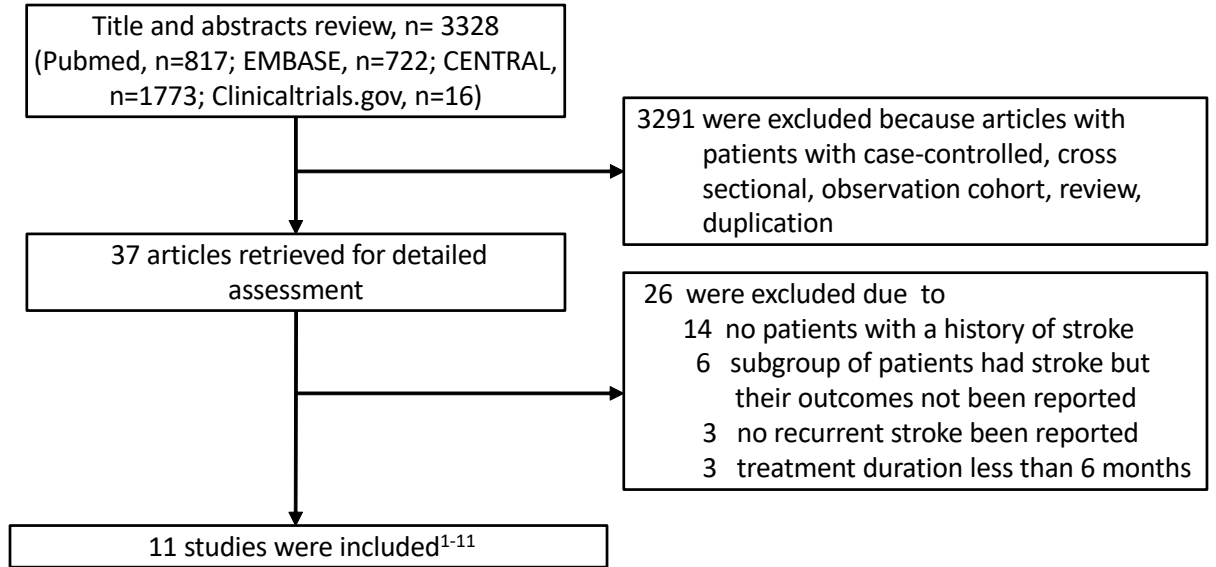

## eFigure 2. Risk of Bias

Legends: Risk of bias for included trials

|                                 | Random sequence generation (selection bias) | Allocation concealment (selection bias) | Blinding of participants and personnel (performance bias) | Blinding of outcome assessment (detection bias) | Incomplete outcome data (attrition bias) | Selective reporting (reporting bias) | Other bias |
|---------------------------------|---------------------------------------------|-----------------------------------------|-----------------------------------------------------------|-------------------------------------------------|------------------------------------------|--------------------------------------|------------|
| CARE <sup>1</sup>               | +                                           | +                                       | +                                                         | +                                               | +                                        | +                                    | +          |
| FOURIER <sup>2</sup>            | +                                           | +                                       | +                                                         | +                                               | +                                        | +                                    | +          |
| HPS <sup>3</sup>                | +                                           | +                                       | ?                                                         | +                                               | +                                        | +                                    | +          |
| IMPROVE-IT <sup>4</sup>         | +                                           | +                                       | +                                                         | +                                               | +                                        | +                                    | +          |
| J-STARS <sup>5</sup>            | +                                           | +                                       | -                                                         | +                                               | +                                        | +                                    | +          |
| LIPID <sup>6</sup>              | +                                           | ?                                       | +                                                         | +                                               | +                                        | +                                    | +          |
| ODYSSEY OUTCOMES <sup>7</sup>   | +                                           | +                                       | +                                                         | +                                               | +                                        | +                                    | +          |
| PODCAST <sup>8</sup>            | +                                           | +                                       | -                                                         | +                                               | +                                        | +                                    | +          |
| SPARCL <sup>9</sup>             | +                                           | ?                                       | +                                                         | +                                               | +                                        | +                                    | ?          |
| TST <sup>10</sup>               | ?                                           | ?                                       | -                                                         | +                                               | +                                        | +                                    | +          |
| Yakusevich et al. <sup>11</sup> | ?                                           | ?                                       | -                                                         | ?                                               | ?                                        | ?                                    | ?          |

## eFigure 3: MACE

Legends: Relative risk with 95% confidence interval of MACE in more intensive vs less intensive LDL-C lowering with statin-based therapies in patients with stroke

MACE: Major adverse cardiovascular events

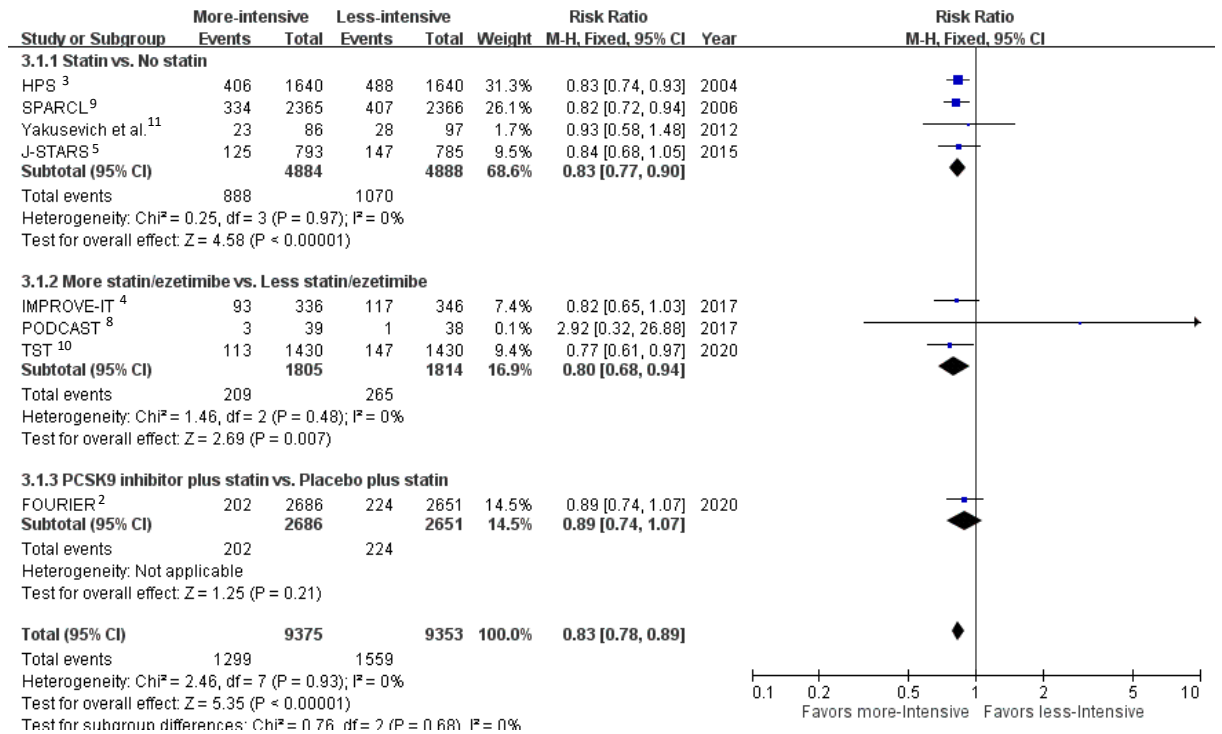

## eFigure 4. Recurrent Ischemic Stroke

Legends: Relative risk with 95% confidence interval of recurrent ischemic stroke in more intensive vs less intensive

LDL-C lowering with statin-based therapies in patients with stroke

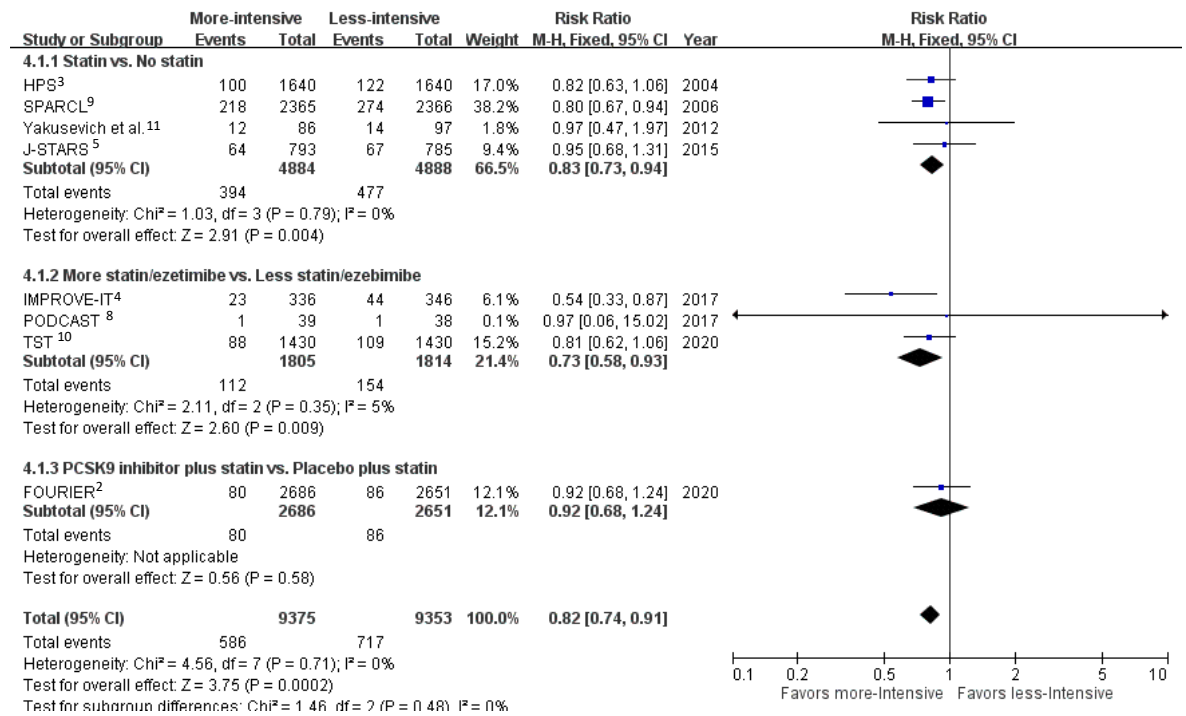

## eFigure 5. Myocardial Infarction

Legends: Relative risk with 95% confidence interval of myocardial infarction in more intensive vs less intensive LDL-

C lowering with statin-based therapies in patients with stroke

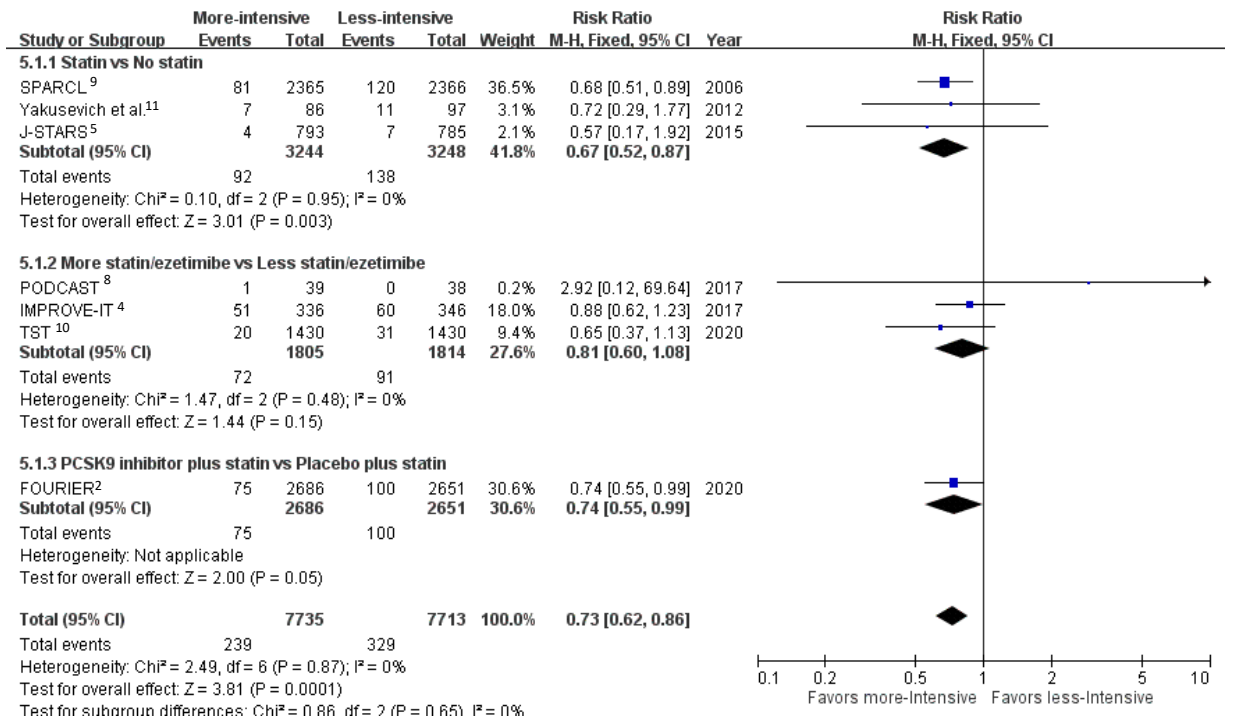

## eFigure 6. All-Cause Mortality

Legends: Relative risk with 95% confidence interval of all-cause mortality in more intensive vs less intensive LDL-C lowering with statin-based therapies in patients with stroke

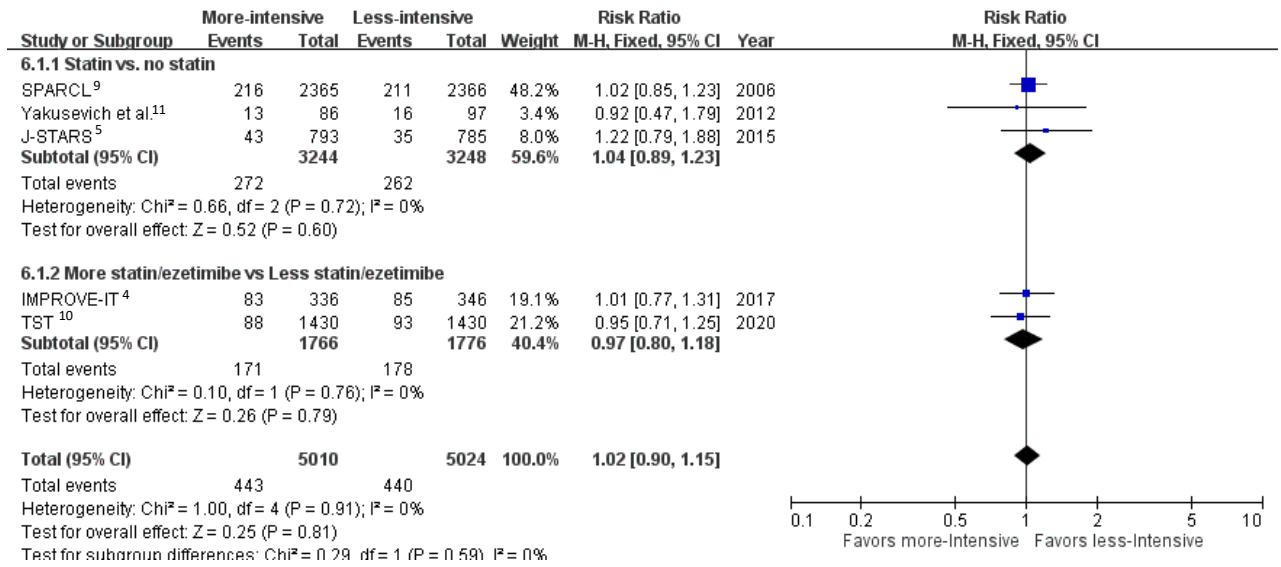

## eFigure 7. Cardiovascular Mortality

Legends: Relative risk with 95% confidence interval of cardiovascular mortality in more intensive vs less intensive

LDL-C lowering with statin-based therapies in patients with stroke

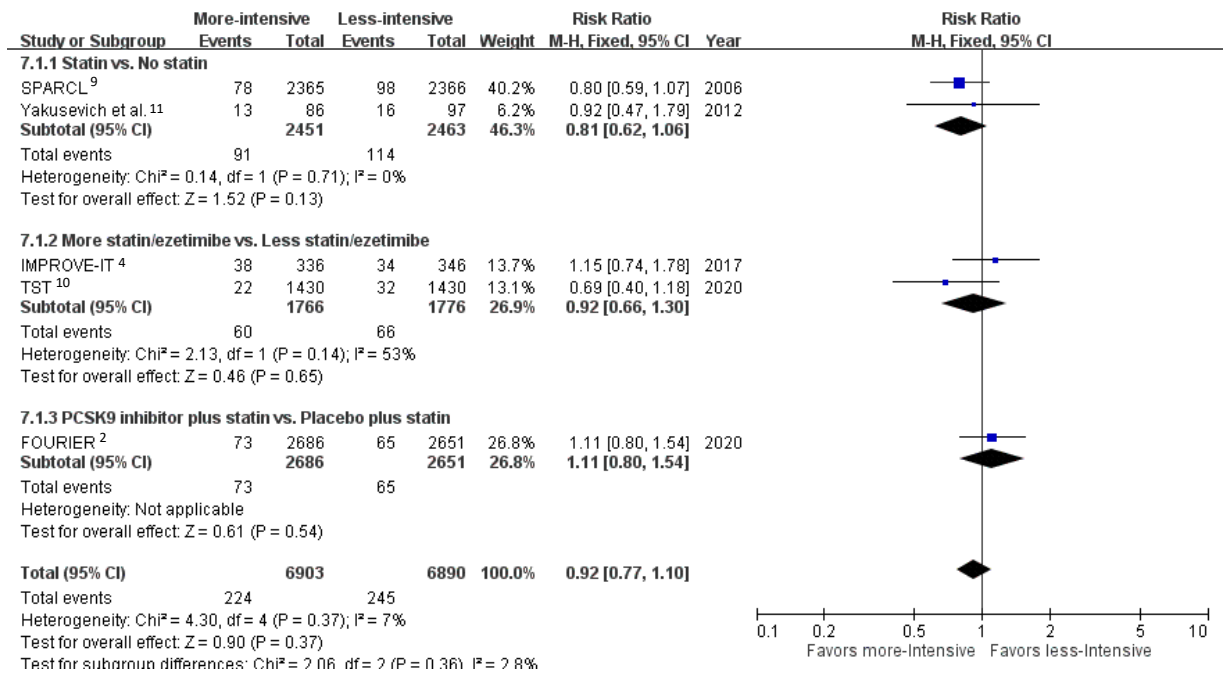



## eFigure 8. New-Onset Diabetes

Legends: Relative risk with 95% confidence interval of new-onset diabetes in more intensive vs less intensive LDL-C lowering with statin-based therapies in patients with stroke

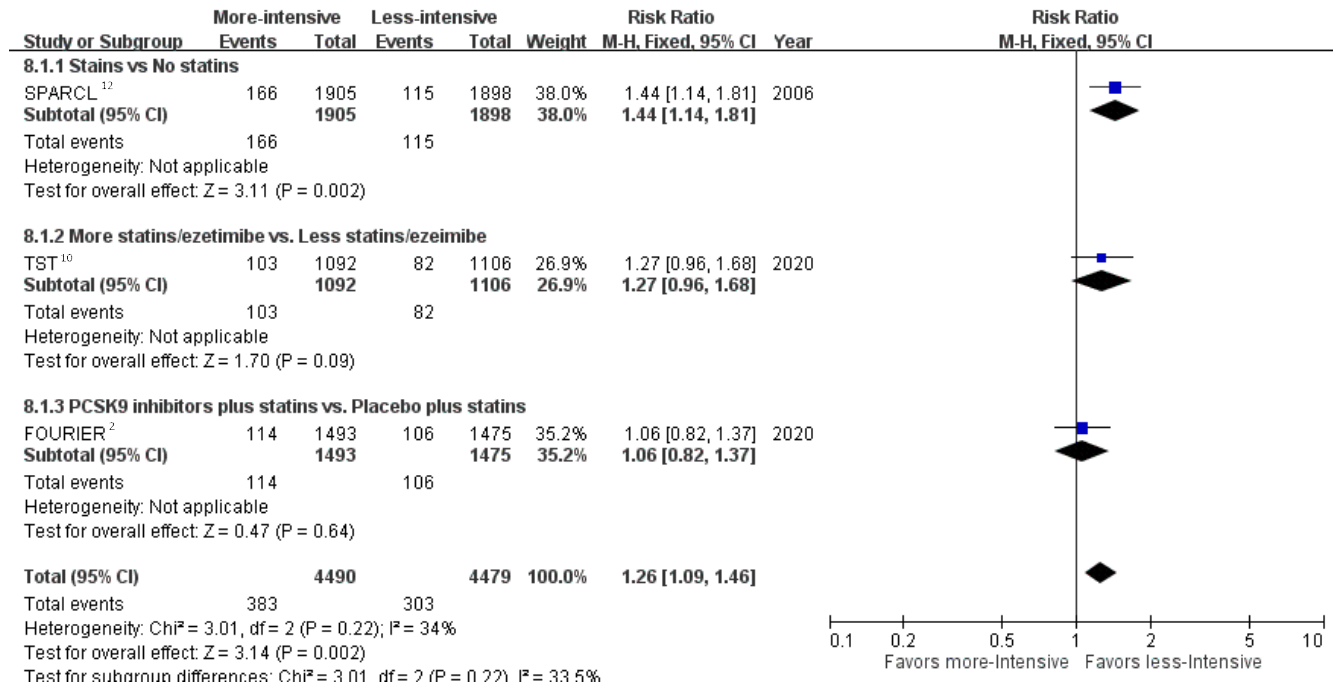

## eFigure 9. Cognitive Adverse Events

Legends: Relative risk with 95% confidence interval of cognitive adverse events in more intensive vs less intensive

LDL-C lowering with statin-based therapies in patients with stroke

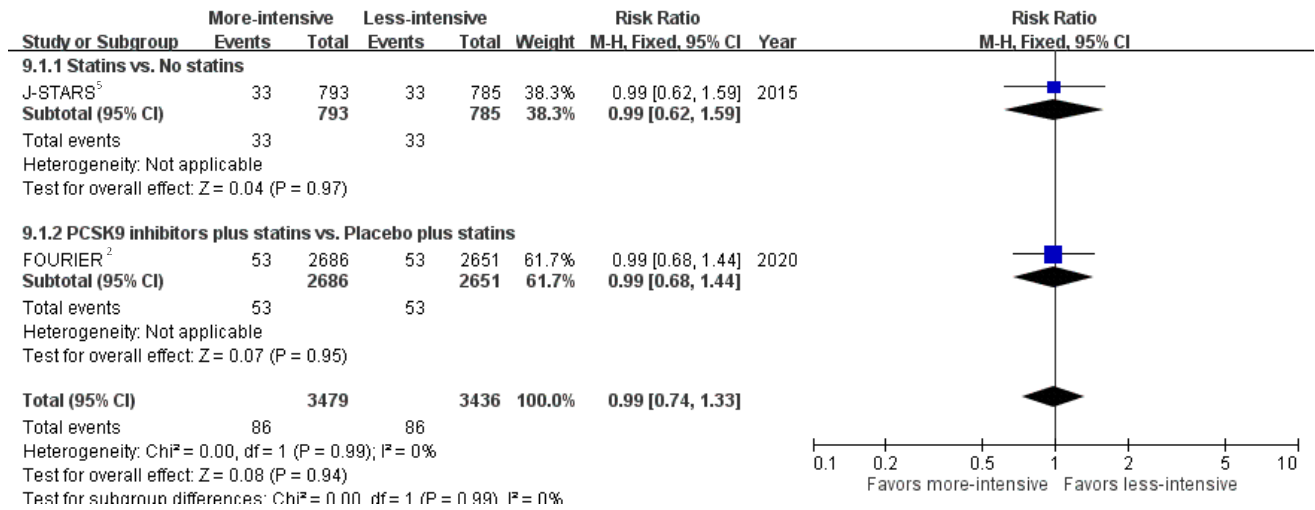

## eFigure 10. Recurrent Stroke

Legends: Relative risk with 95% confidence interval of recurrent stroke in more intensive vs less intensive LDL-C

lowering with statin-based therapies in patients with ischemic stroke as an entry event

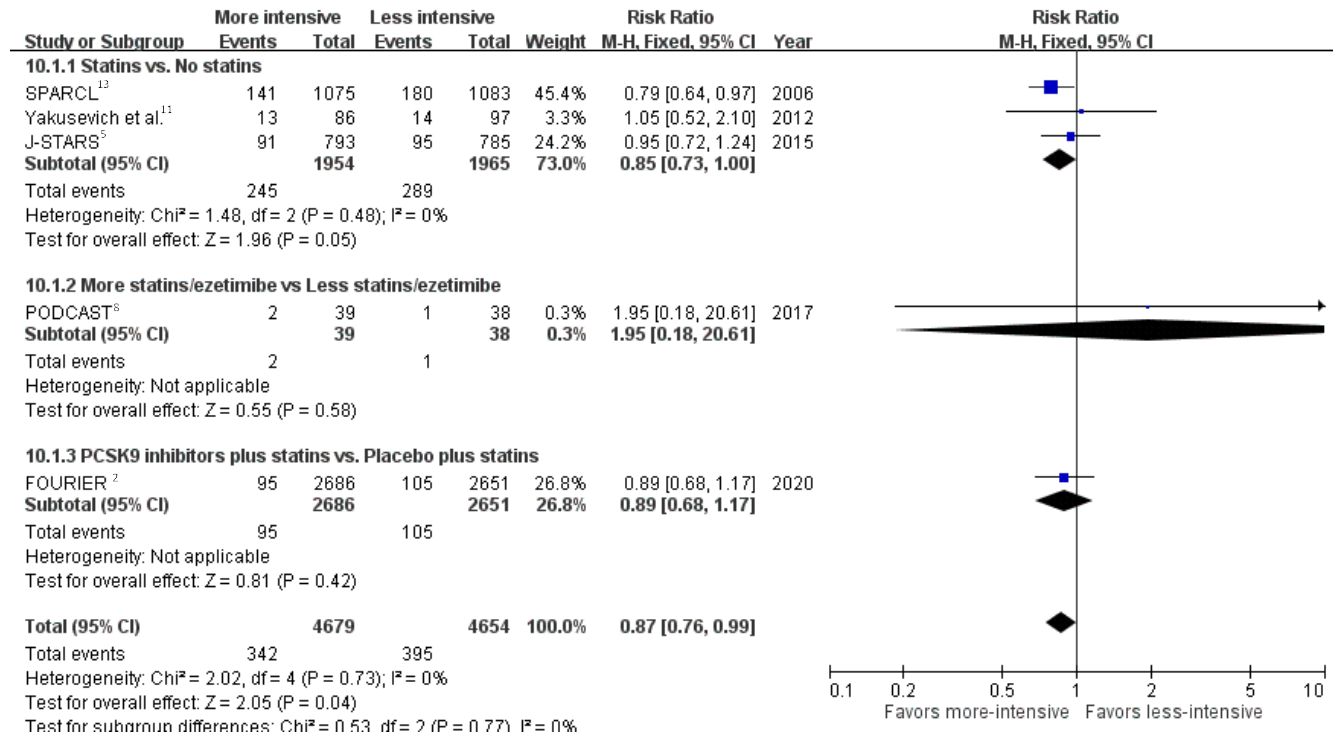

## eFigure 11. Recurrent Stroke

Legends: Relative risk with 95% confidence interval of recurrent stroke in more intensive vs less intensive LDL-C

lowering with statin-based therapies in patients with stroke and taking statins in both arms

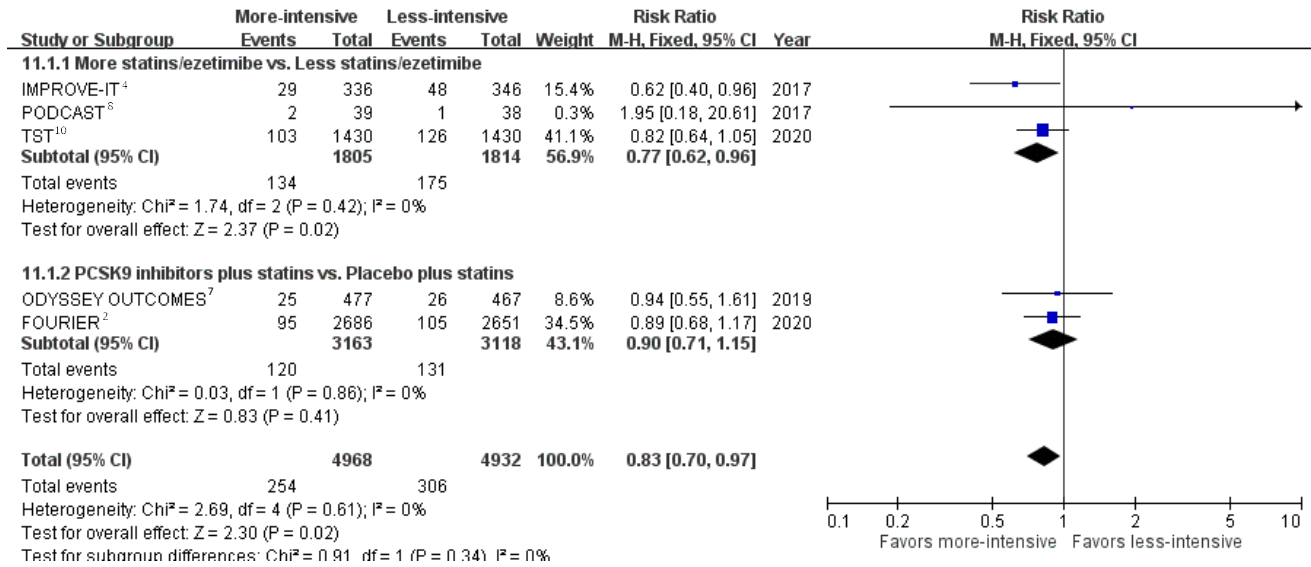

### eFigure 12. Meta-regression

Legends: Meta-regression of included trials to explore the relation between degree of LDL-C lowering and recurrent stroke rate

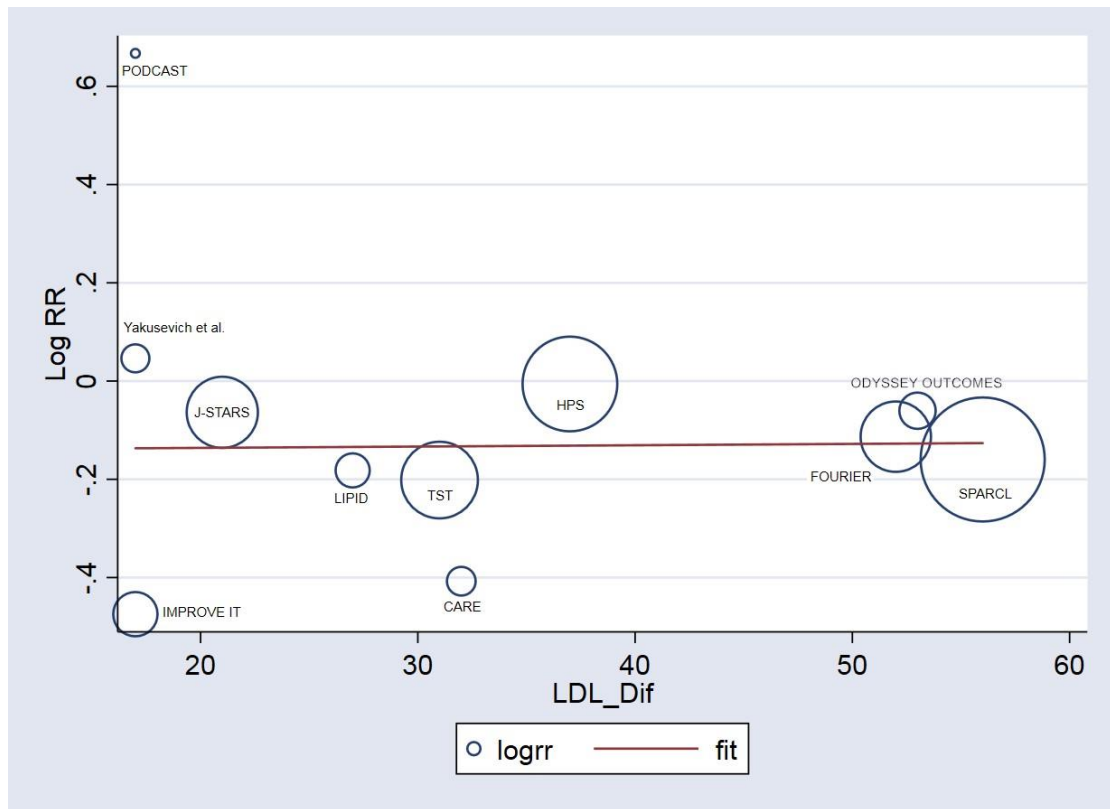

## eFigure 13. Subgroup Analyses

Legends: Subgroup analyses based on the characteristics of trials

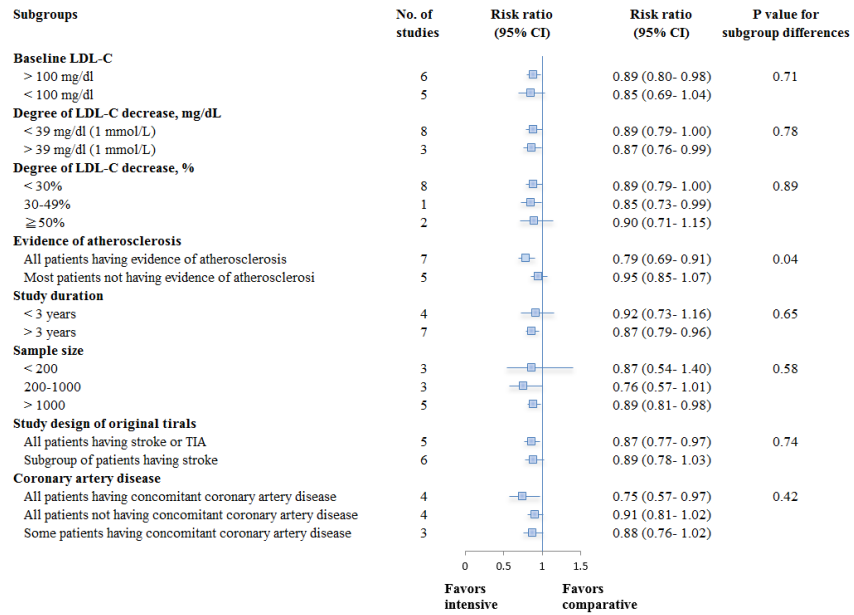

## eFigure 14. Publication Bias

Legends: Trim-and-fill analysis for included trials to explore potential publication bias

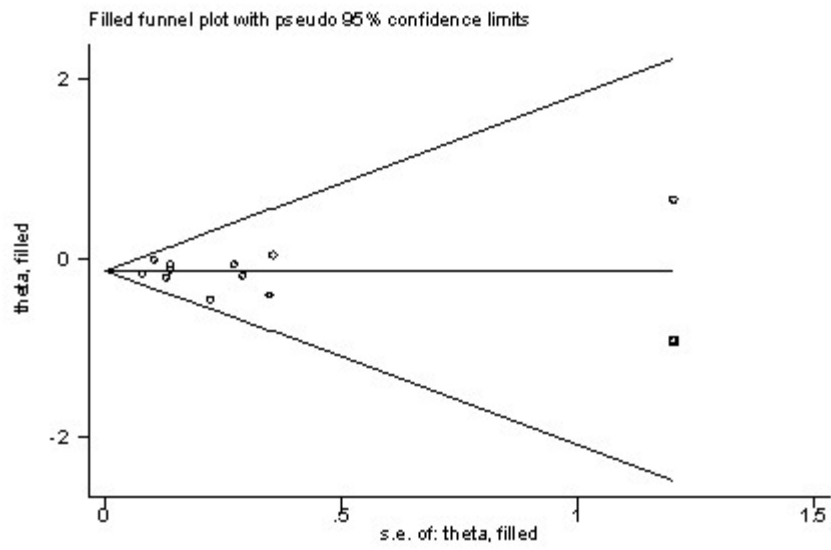

## eReferences.

1. Plehn JF, Davis BR, Sacks FM, et al. Reduction of stroke incidence after myocardial infarction with pravastatin: the Cholesterol and Recurrent Events (CARE) study. The Care Investigators. *Circulation*. 1999;99(2):216-223.
2. Giugliano RP, Pedersen TR, Saver JL, et al. Stroke Prevention With the PCSK9 (Proprotein Convertase Subtilisin-Kexin Type 9) Inhibitor Evolocumab Added to Statin in High-Risk Patients With Stable Atherosclerosis. *Stroke*. 2020;51(5):1546-1554.
3. Collins R, Armitage J, Parish S, Sleight P, Peto R, Heart Protection Study Collaborative G. Effects of cholesterol-lowering with simvastatin on stroke and other major vascular events in 20536 people with cerebrovascular disease or other high-risk conditions. *Lancet*. 2004;363(9411):757-767.
4. Bohula EA, Wiviott SD, Giugliano RP, et al. Prevention of Stroke with the Addition of Ezetimibe to Statin Therapy in Patients With Acute Coronary Syndrome in IMPROVE-IT (Improved Reduction of Outcomes: Vytorin Efficacy International Trial). *Circulation*. 2017;136(25):2440-2450.
5. Hosomi N, Nagai Y, Kohriyama T, et al. The Japan Statin Treatment Against Recurrent Stroke (J-STARS): A Multicenter, Randomized, Open-label, Parallel-group Study. *EBioMedicine*. 2015;2(9):1071-1078.
6. White HD, Simes RJ, Anderson NE, et al. Pravastatin therapy and the risk of stroke. *N Engl J Med*. 2000;343(5):317-326.
7. Jukema JW, Zijlstra LE, Bhatt DL, et al. Effect of Alirocumab on Stroke in ODYSSEY OUTCOMES. *Circulation*. 2019;140(25):2054-2062.
8. Bath PM, Scutt P, Blackburn DJ, et al. Intensive versus Guideline Blood Pressure and Lipid Lowering in Patients with Previous Stroke: Main Results from the Pilot 'Prevention of Decline in Cognition after Stroke Trial' (PODCAST) Randomised Controlled Trial. *PLoS One*. 2017;12(1):e0164608.
9. Amarenco P, Bogousslavsky J, Callahan A, 3rd, et al. High-dose atorvastatin after stroke or transient ischemic attack. *N Engl J Med*. 2006;355(6):549-559.
10. Amarenco P, Kim JS, Labreuche J, et al. A Comparison of Two LDL Cholesterol Targets after Ischemic Stroke. *N Engl J Med*. 2020;382(1):9.
11. Yakusevich VV, Malygin AY, Lychenko SV, Petrochenko AS, Kabanov AV. The efficacy of high-dose simvastatin in acute period of ischemic stroke. *Rational Pharmacother Card*. 2012;8:4-16.



12. Waters DD, Ho JE, DeMicco DA, et al. Predictors of new-onset diabetes in patients treated with atorvastatin: results from 3 large randomized clinical trials. *J Am Coll Cardiol.* 2011;57(14):1535-1545.
13. Amarenco P, Benavente O, Goldstein LB, et al. Results of the Stroke Prevention by Aggressive Reduction in Cholesterol Levels (SPARCL) trial by stroke subtypes. *Stroke.* 2009;40(4):1405-1409.
